# Supplementary material for: Multi-temporal high-resolution data products of ecosystem structure derived from country-wide airborne laser scanning surveys of the Netherlands
Source: Copernicus journal article supplement (doi:10.5194/essd-2024-488), 2024-11-25

**AHN2**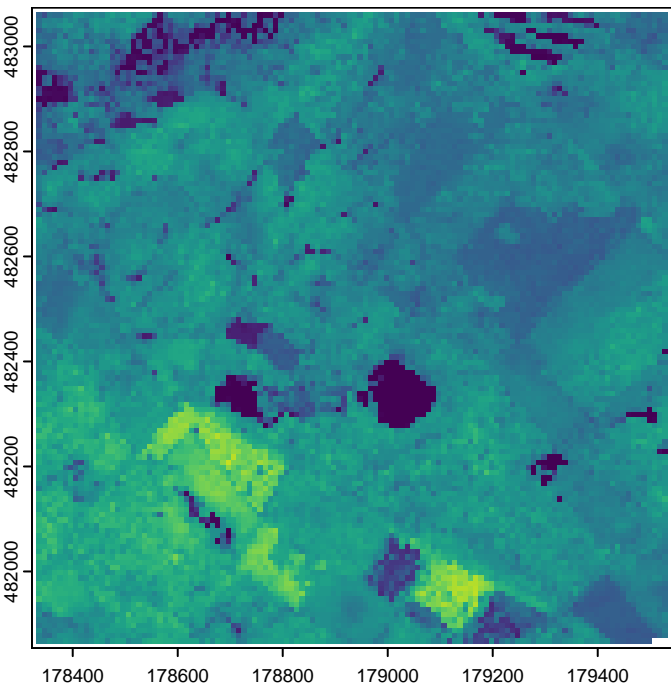**AHN3**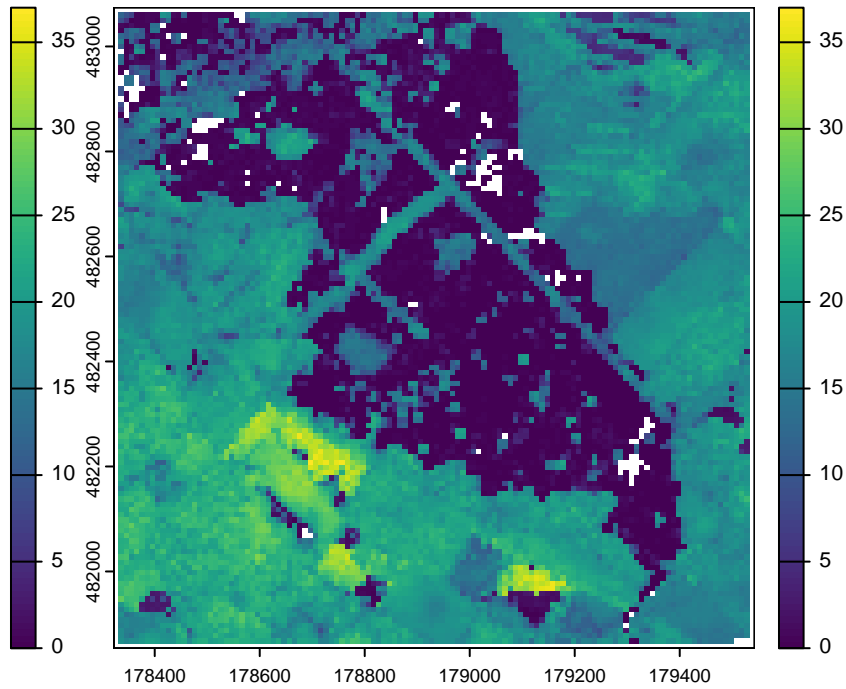**AHN4**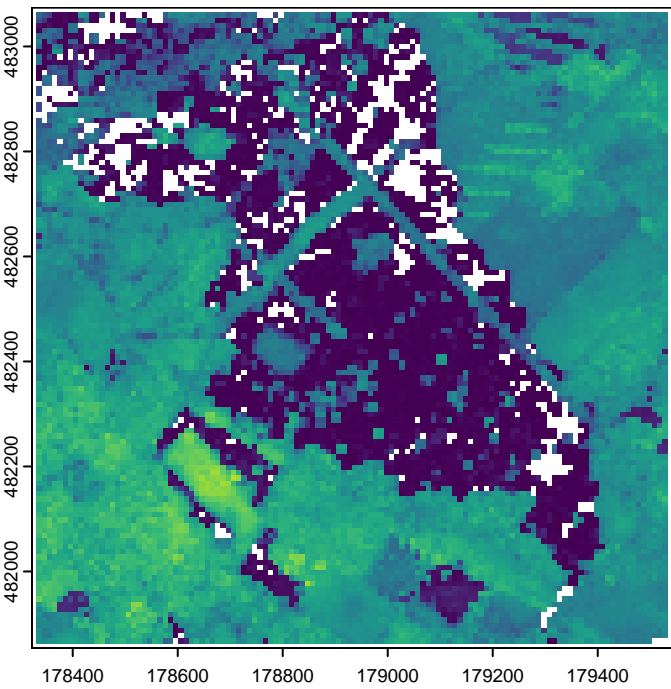**AHN5**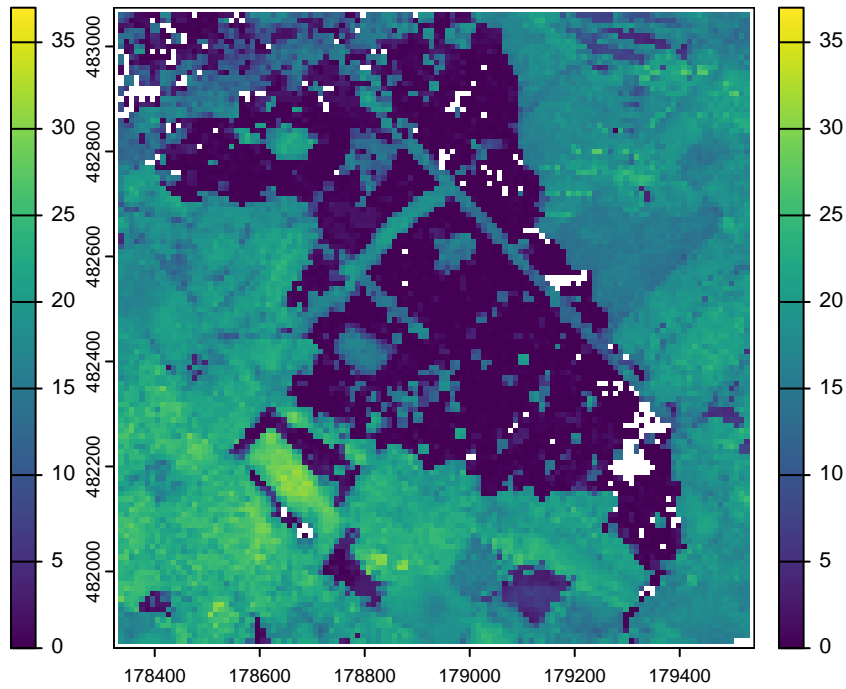

Supplement: Supplementary file [file essd-2024-488-RC1-supplement.pdf]
